# Supplementary material for: Large-scale, dynamin-like motions of the human guanylate binding protein 1 revealed by multi-resolution simulations
Source: PubMed Central journal article supplement (PMC6797221; doi:10.1371/journal.pcbi.1007193), 2019-10-07

A

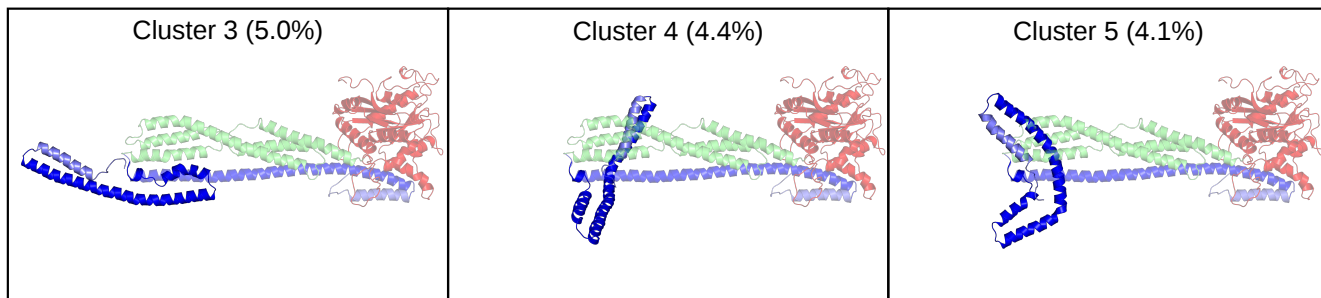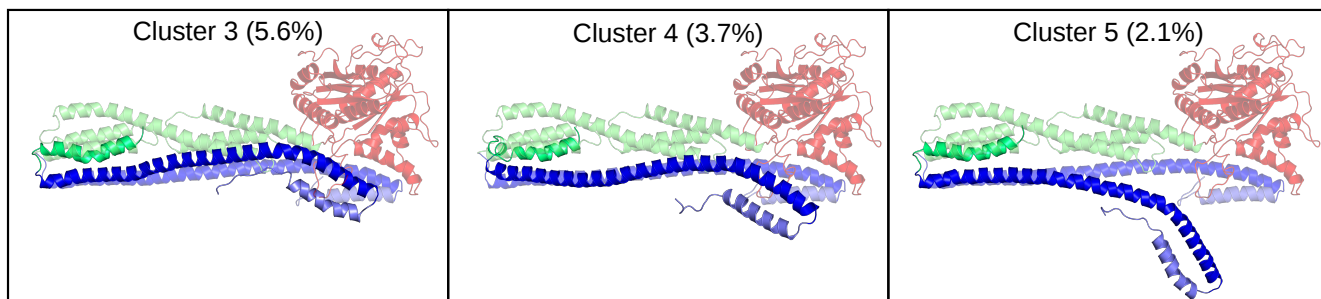

B

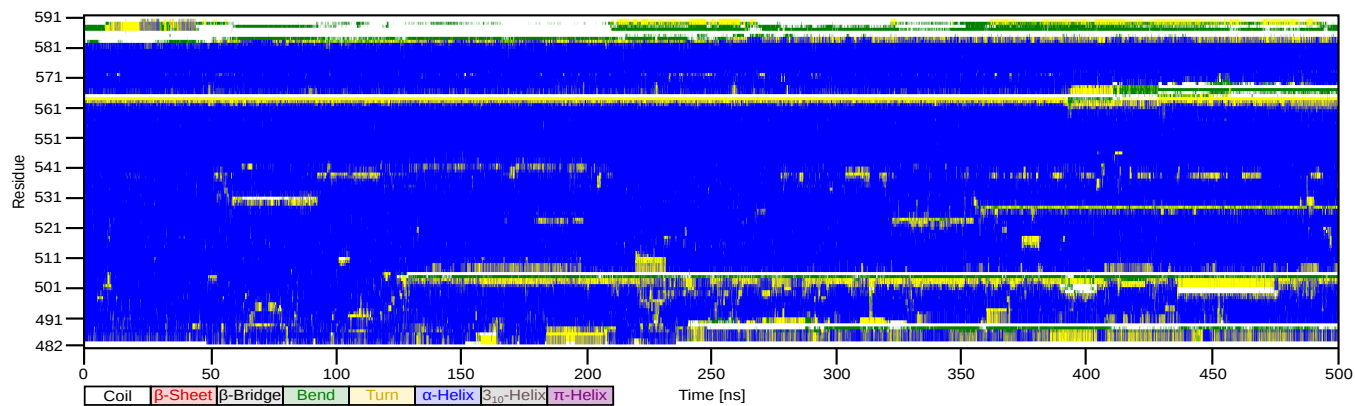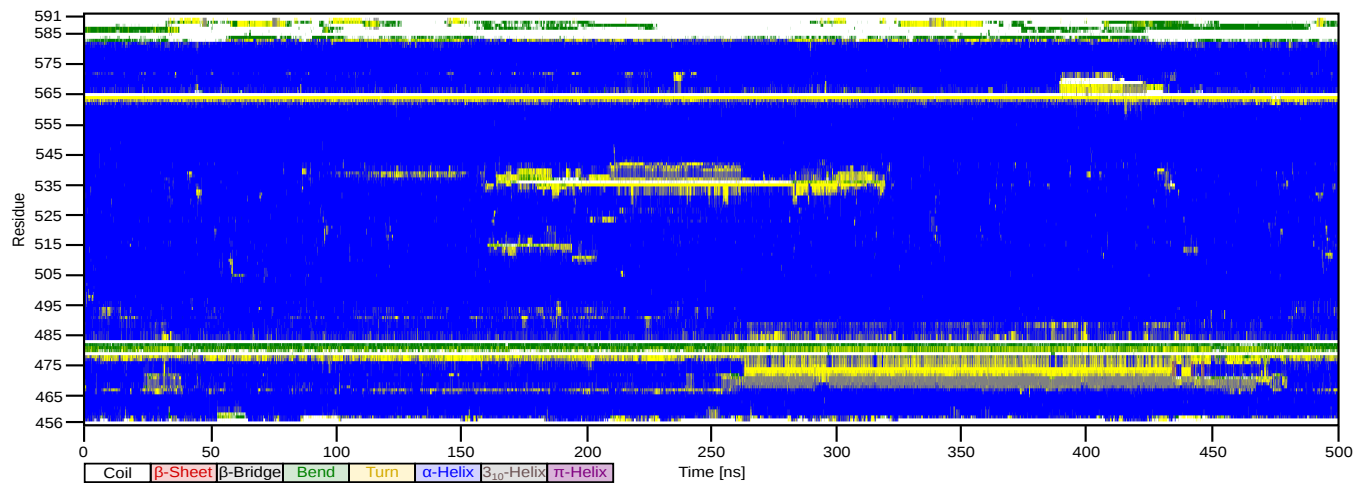

Supplement: pcbi.1007193.s003.pdf [file pcbi.1007193.s003.pdf]
