# Supplementary material for: Large-scale, dynamin-like motions of the human guanylate binding protein 1 revealed by multi-resolution simulations
Source: PubMed Central journal article supplement (PMC6797221; doi:10.1371/journal.pcbi.1007193), 2019-10-07
Supplement: pcbi.1007193.s009.pdf [file pcbi.1007193.s009.pdf]

CG-to-AA dimer at 0 ns

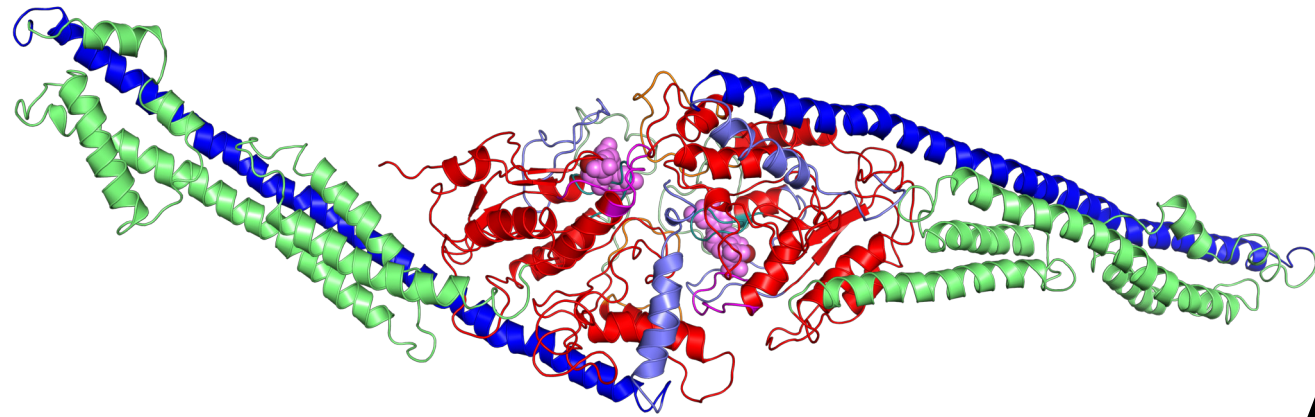

A

Comparison between constructed and CG-to-AA dimer models

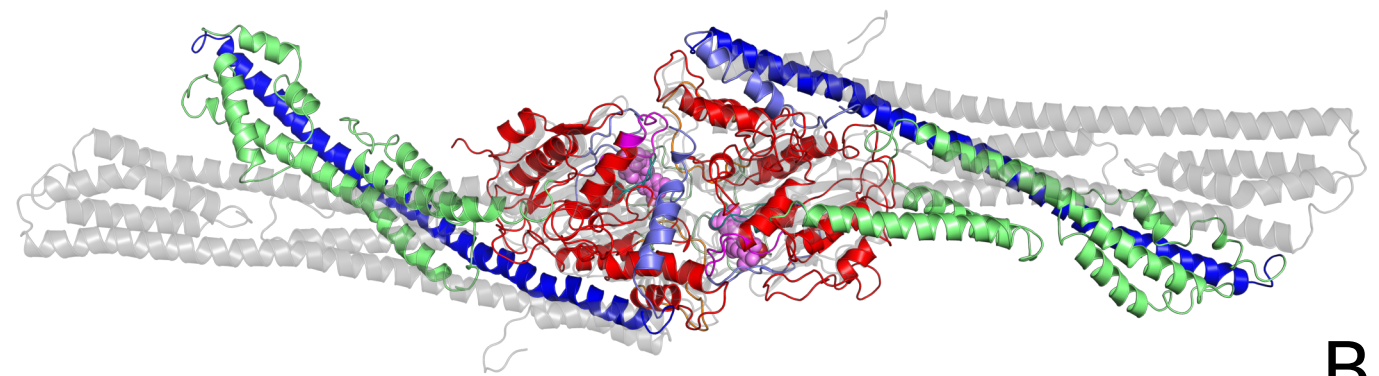

B

CG-to-AA dimer at 50 ns

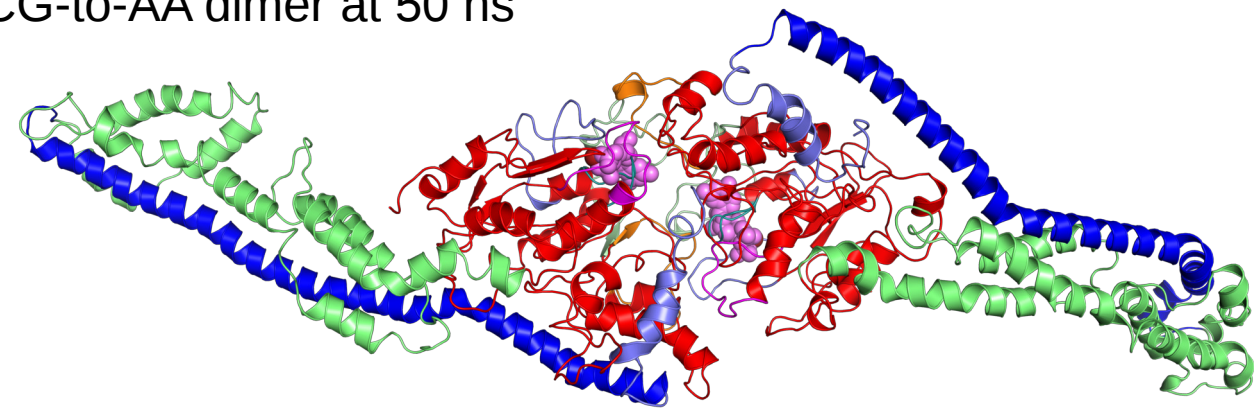

C

CG-to-AA dimer at 100 ns

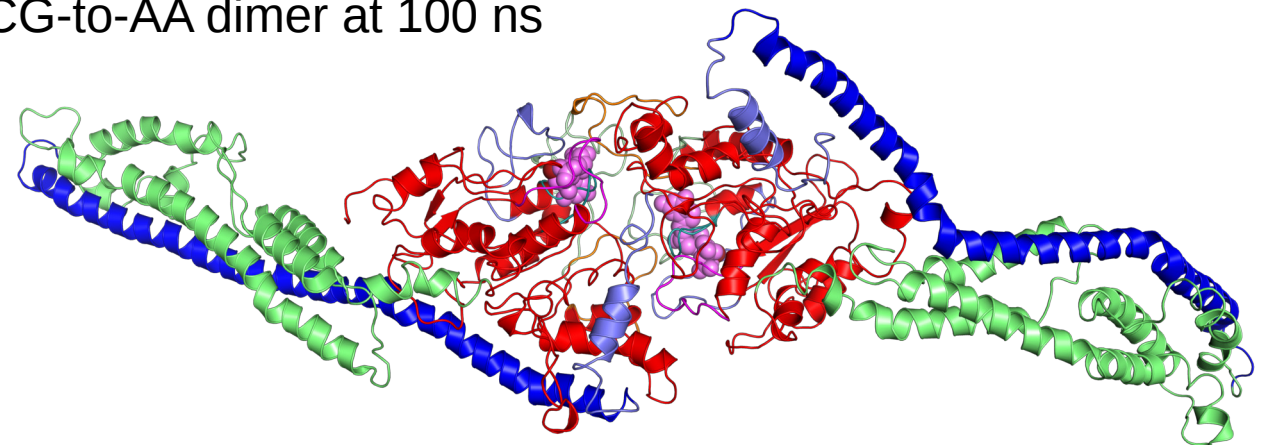

D

RMSF of CG-to-AA dimer

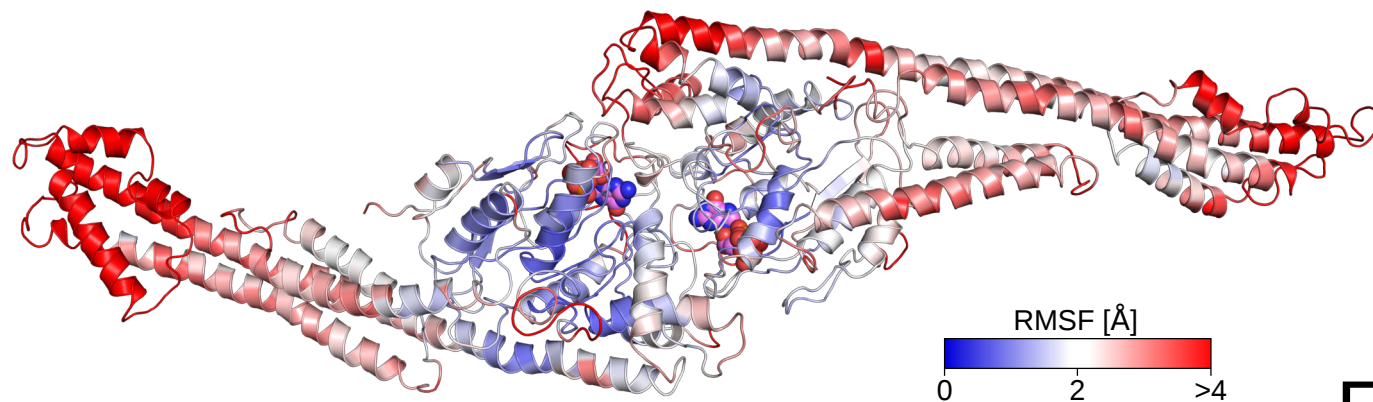

E

Clustering of the loops of the LG domains of CG-to-AA dimer

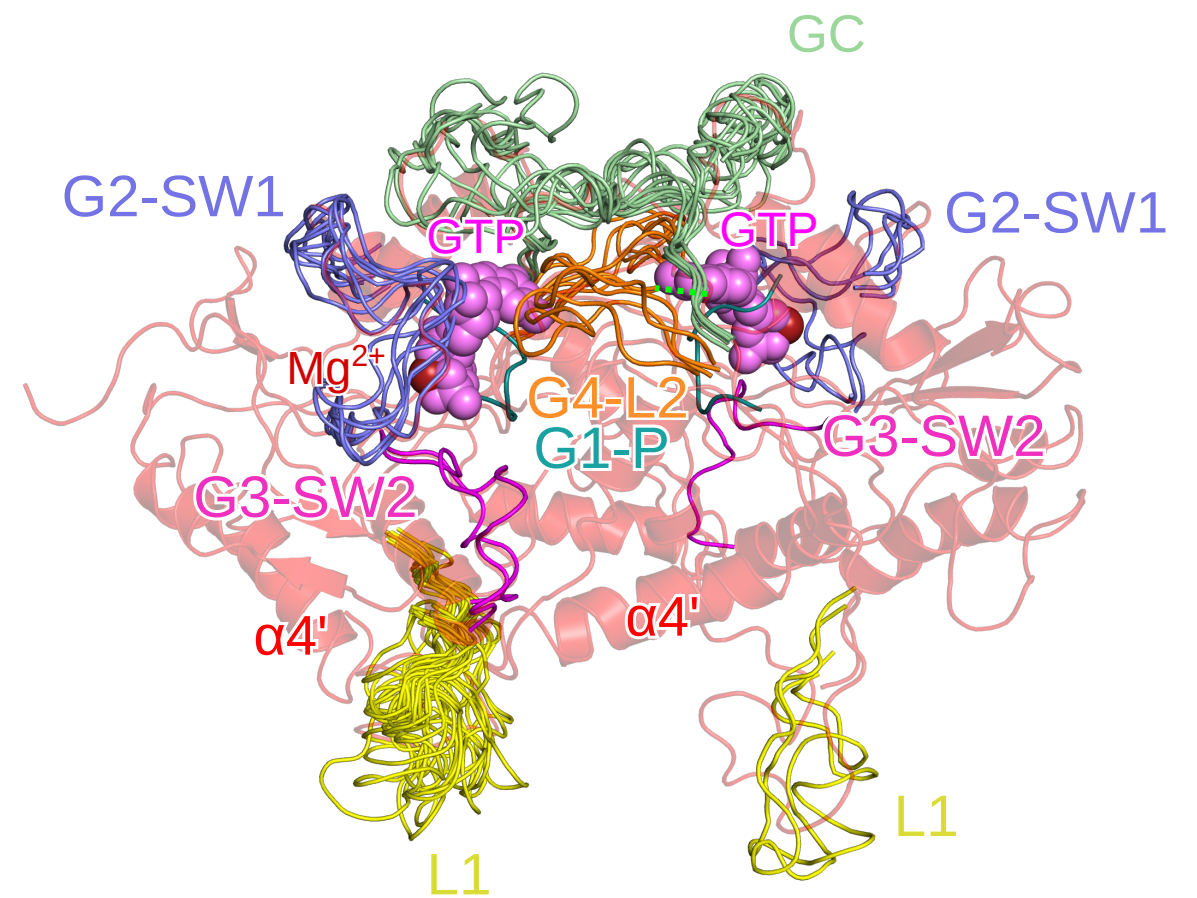

G

Distance between Q577 residues in CG-to-AA dimer

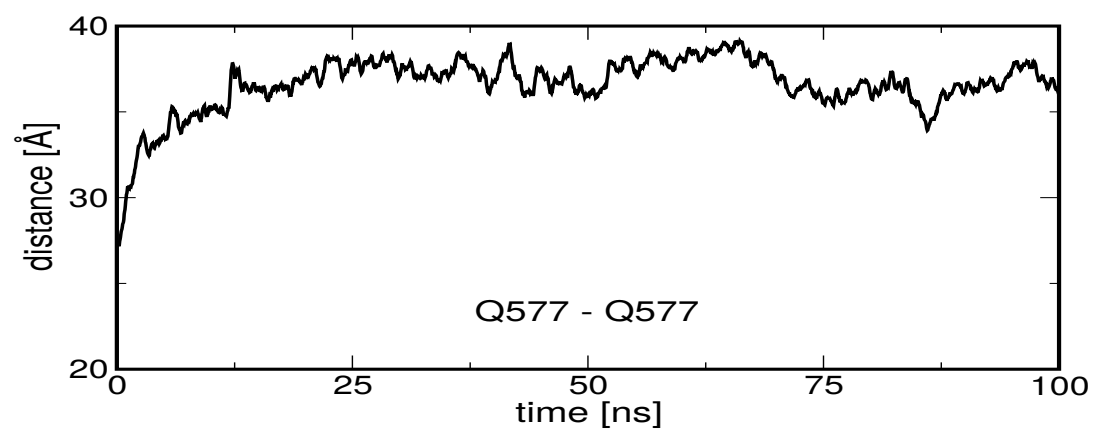

F
