# Supplementary material for: Large-scale, dynamin-like motions of the human guanylate binding protein 1 revealed by multi-resolution simulations
Source: PubMed Central journal article supplement (PMC6797221; doi:10.1371/journal.pcbi.1007193), 2019-10-07
Supplement: pcbi.1007193.s011.pdf [file pcbi.1007193.s011.pdf]

## Supporting Information - Table

| RESOURCE                       | SOURCE            | IDENTIFIER                                                                                        |
|--------------------------------|-------------------|---------------------------------------------------------------------------------------------------|
| <b>Software and Algorithms</b> |                   |                                                                                                   |
| ModLoop                        | (49, 50)          | <a href="https://modbase.compbio.ucsf.edu/modloop/">https://modbase.compbio.ucsf.edu/modloop/</a> |
| Gromacs 2016, 4.5.5            | (52, 54, 55)      | <a href="http://www.gromacs.org/">http://www.gromacs.org/</a>                                     |
| PLUMED version 2.0             | (53)              | <a href="https://www.plumed.org/">https://www.plumed.org/</a>                                     |
| Maestro                        | (60)              | <a href="https://www.schrodinger.com/maestro">https://www.schrodinger.com/maestro</a>             |
| Gaussian 09                    | (66)              | <a href="https://gaussian.com/">https://gaussian.com/</a>                                         |
| VMD                            | (68)              | <a href="https://www.ks.uiuc.edu/Research/vmd/">https://www.ks.uiuc.edu/Research/vmd/</a>         |
| PyMol                          | (69)              | <a href="https://pymol.org/">https://pymol.org/</a>                                               |
| DSSP                           | (70)              | <a href="https://swift.cmbi.umcn.nl/gv/dssp/">https://swift.cmbi.umcn.nl/gv/dssp/</a>             |
| PyEMMA                         | (73)              | <a href="http://emma-project.org/">http://emma-project.org/</a>                                   |
| <b>Databases</b>               |                   |                                                                                                   |
| PDB files                      | Protein Data Bank | <a href="https://www.rcsb.org/">https://www.rcsb.org/</a>                                         |
